# Supplementary material for: Gender Differences in Familiar Face Recognition and the Influence of Sociocultural Gender Inequality
Source: PubMed Central journal article supplement (PMC6884510; doi:10.1038/s41598-019-54074-5), 2019-11-29
Supplement: 41598_2019_54074_MOESM1_ESM.pdf [file 41598_2019_54074_MOESM1_ESM.pdf]

**Gender Differences in Familiar Face Recognition and the Influence of Sociocultural  
Gender Inequality**

Maruti V. Mishra<sup>1,2</sup>, Jirapat Likitlersuang<sup>1,2</sup>, Jeremy Wilmer<sup>3</sup>, Sarah Cohan<sup>4</sup>, Laura Germine<sup>5</sup>,  
Joseph M. DeGutis<sup>1,2\*</sup>

## Supplementary materials.

Table S1. List with the Name, Identity, test number and fame scores of the famous faces used in this study

| FFMT name | Face Number | Gender | Profession | Actual Name                        | Identity           | Fame-Score | Age |
|-----------|-------------|--------|------------|------------------------------------|--------------------|------------|-----|
| FFMT1     | 1           | Female | Actor/TV   | Oprah Winfrey                      | Oprah Winfrey      | 5.701      | 65  |
| FFMT1     | 2           | Male   | Actor/TV   | George Timothy Clooney             | George Clooney     | 5.446      | 57  |
| FFMT1     | 3           | Male   | Musician   | Michael Joseph Jackson             | Michael Jackson    | 7.054      | 50  |
| FFMT1     | 4           | Male   | Actor/TV   | John Joseph Nicholson              | Jack Nicholson     | 5.164      | 81  |
| FFMT1     | 5           | Male   | Actor/TV   | James Thomas Fallon                | Jimmy Fallon       | 4.457      | 44  |
| FFMT1     | 6           | Male   | Musician   | Justin Randall Timberlake          | Justin Timberlake  | 5.365      | 38  |
| FFMT1     | 7           | Female | Actor/TV   | Kristen Jaymes Stewart             | Kristen Stewart    | 4.284      | 28  |
| FFMT1     | 8           | Male   | Actor/TV   | John Christopher Depp II           | Johnny Depp        | 5.665      | 55  |
| FFMT1     | 9           | Male   | Actor/TV   | William Bradley Pitt               | Brad Pitt          | 5.7        | 55  |
| FFMT1     | 10          | Female | Actor/TV   | Norma Jeane Mortenson (Baker)      | Marilyn Monroe     | 6.15       | 36  |
| FFMT1     | 11          | Male   | Politician | William Jefferson Clinton          | Bill Clinton       | 7.111      | 72  |
| FFMT1     | 12          | Male   | Politician | Martin Luther King, Jr             | Martin Luther King | 6.378      | 39  |
| FFMT1     | 13          | Male   | Actor/TV   | Robin McLaurim Williams            | Robin Williams     | 5.38       | 63  |
| FFMT1     | 14          | Male   | Actor/TV   | Conan Christopher O'Brien          | Conan O'Brien      | 5.1938     | 55  |
| FFMT1     | 15          | Male   | Musician   | Justin Drew Bieber                 | Justin Bieber      | 4.722      | 25  |
| FFMT1     | 16          | Female | Actor/TV   | Hannah Dakota Fanning              | Dakota Fanning     | 4.646      | 25  |
| FFMT1     | 17          | Male   | Actor/TV   | Denzel Hayes Washington, Jr.       | Denzel Washington  | 5.054      | 64  |
| FFMT1     | 18          | Female | Musician   | Taylor Alison Swift                | Taylor Swift       | 5.014      | 29  |
| FFMT1     | 19          | Male   | Actor/TV   | Jonah Hill Feldstein               | Jonah Hill         | 3.829      | 35  |
| FFMT1     | 20          | Female | Musician   | Demetria Devonne Lovato            | Demi Lovato        | 4.601      | 26  |
| FFMT1     | 21          | Female | Politician | Michelle LaVaughn Obama            | Michelle Obama     | 4.96       | 55  |
| FFMT1     | 22          | Female | Musician   | Stefani Joanne Angelina Germanotta | Lady Gaga          | 5.724      | 32  |

|       |    |        |            |                                    |                                |       |    |
|-------|----|--------|------------|------------------------------------|--------------------------------|-------|----|
| FFMT1 | 23 | Female | Actor/TV   | Kimberly Noel (Kardashian) West    | Kim Kardashian                 | 4.557 | 38 |
| FFMT1 | 24 | Female | Actor/TV   | Lucy Alexis Liu                    | Lucy Liu                       | 4.369 | 50 |
| FFMT1 | 25 | Female | Actor/TV   | Kristen Anne Bell                  | Kristen Bell                   | 4.124 | 38 |
| FFMT1 | 26 | Male   | Actor/TV   | John Joseph Travolta               | John Travolta                  | 5.128 | 65 |
| FFMT1 | 27 | Female | Politician | Hillary Diane Rodham Clinton       | Hillary Clinton                | 6.479 | 71 |
| FFMT2 | 1  | Male   | Politician | Martin Luther King, Jr.            | Martin Luther King             | 6.378 | 39 |
| FFMT2 | 2  | Male   | Actor/TV   | William Bradley Pitt               | Brad Pitt                      | 5.7   | 55 |
| FFMT2 | 3  | Male   | Politician | George Walker Bush                 | George Bush, "W"               | 7.872 | 72 |
| FFMT2 | 4  | Female | Actor/TV   | Kimberly Noel (Kardashian) West    | Kim Kardashian                 | 4.557 | 38 |
| FFMT2 | 5  | Male   | Actor/TV   | John Joseph Travolta               | John Travolta                  | 5.128 | 65 |
| FFMT2 | 6  | Female | Actor/TV   | Kristen Jaymes Stewart             | Kristen Stewart                | 4.284 | 28 |
| FFMT2 | 7  | Male   | Actor/TV   | James Douglas Muir Leno            | Jay Leno                       | 5.17  | 68 |
| FFMT2 | 8  | Male   | Actor/TV   | Daniel Jacob Radcliffe             | Daniel Radcliffe, Harry Potter | 4.991 | 29 |
| FFMT2 | 9  | Male   | Musician   | Elvis Aaron Presley                | Elvis Presley                  | 7.019 | 42 |
| FFMT2 | 10 | Female | Musician   | Miley Ray Cyrus                    | Miley Ray Cyrus                | 5.529 | 26 |
| FFMT2 | 11 | Male   | Actor/TV   | George Timothy Clooney             | George Clooney                 | 5.446 | 57 |
| FFMT2 | 12 | Male   | Politician | Barack Hussein Obama II            | Barack Obama                   | 7.4   | 57 |
| FFMT2 | 13 | Female | Actor/TV   | Oprah Winfrey                      | Oprah Winfrey                  | 5.701 | 65 |
| FFMT2 | 14 | Male   | Actor/TV   | Mark Robert Michael Wahlberg       | Mark Wahlberg, Marky Mark      | 4.808 | 47 |
| FFMT2 | 15 | Female | Musician   | Stefani Joanne Angelina Germanotta | Lady Gaga                      | 5.724 | 32 |
| FFMT2 | 16 | Male   | Actor/TV   | James Thomas Fallon                | Jimmy Fallon                   | 4.457 | 44 |
| FFMT2 | 17 | Female | Actor/TV   | Norma Jeane Mortenson (Baker)      | Marilyn Monroe                 | 6.15  | 36 |
| FFMT2 | 18 | Male   | Musician   | Justin Drew Bieber                 | Justin Bieber                  | 4.722 | 25 |
| FFMT2 | 19 | Male   | Actor/TV   | Robin McLaurim Williams            | Robin Williams                 | 5.38  | 63 |
| FFMT2 | 20 | Male   | Actor/TV   | David Michael Letterman            | David Letterman                | 5.131 | 71 |
| FFMT2 | 21 | Female | Musician   | Barbara Streisand                  | Barbara Streisand              | 5.528 | 76 |
| FFMT2 | 22 | Male   | Politician | William Jefferson Clinton          | Bill Clinton                   | 7.111 | 72 |

|       |    |        |            |                                    |                                |       |    |
|-------|----|--------|------------|------------------------------------|--------------------------------|-------|----|
| FFMT2 | 23 | Male   | Musician   | Shawn Corey Carter                 | JayZ                           | 5.841 | 49 |
| FFMT2 | 24 | Male   | Actor/TV   | Robert Douglas Thomas Pattinson    | Robert Pattinson               | 4.202 | 32 |
| FFMT2 | 25 | Female | Politician | Hillary Diane Rodham Clinton       | Hillary Clinton                | 6.479 | 71 |
| FFMT2 | 26 | Male   | Actor/TV   | Arnold Alois Schwarzenegger        | Arnold Schwarzenegger          | 6.147 | 71 |
| FFMT2 | 27 | Female | Actor/TV   | Elizabeth Stamatina Fey            | Tina Fey                       | 4.581 | 48 |
| FFMT2 | 28 | Male   | Musician   | Michael Joseph Jackson             | Michael Jackson                | 7.054 | 50 |
| FFMT2 | 29 | Male   | Actor/TV   | John Joseph Jack Nicholson         | Jack Nicholson                 | 6.164 | 81 |
| FFMT2 | 30 | Female | Musician   | Taylor Alison Swift                | Taylor Swift                   | 5.014 | 29 |
| FFMT2 | 31 | Male   | Actor/TV   | Benjamin Géza Affleck-Boldt        | Ben Affleck                    | 5.029 | 46 |
| FFMT2 | 32 | Male   | Actor/TV   | Orenthal James Simpson             | O. J. Simpson                  | 5.166 | 71 |
| FFMT2 | 33 | Female | Actor/TV   | Lucy Alexis Liu                    | Lucy Liu                       | 4.369 | 50 |
| FFMT2 | 34 | Male   | Actor/TV   | William Henry Cosby, Jr.           | Bill Cosby                     | 5.38  | 81 |
| FFMT2 | 35 | Male   | Actor/TV   | Denzel Hayes Washington, Jr.       | Denzel Washington              | 5.054 | 64 |
| FFMT2 | 36 | Male   | Actor/TV   | David Jude Heyworth Coan Law       | Jude Law                       | 4.736 | 46 |
| FFMT2 | 37 | Male   | Actor/TV   | Willard Carroll Smith, Jr.         | Will Smith                     | 5.432 | 50 |
| FFMT2 | 38 | Female | Politician | Michelle LaVaughn (Robinson) Obama | Michelle Obama                 | 4.96  | 55 |
| FFMT2 | 39 | Male   | Actor/TV   | William James Murray               | Bill Murray                    | 2.834 | 68 |
| FFMT2 | 40 | Male   | Musician   | Justin Randall Timberlake          | Justin Timberlake              | 5.365 | 38 |
| FFMT3 | 1  | Male   | Politician | John Fitzgerald Kennedy            | John F Kennedy, JFK            | 6.816 | 46 |
| FFMT3 | 2  | Female | Actor/TV   | Angelina Jolie                     | Angelina Jolie                 | 5.348 | 43 |
| FFMT3 | 3  | Male   | Musician   | Sir James Paul McCartney CH MB E   | Paul McCartney                 | 6.477 | 76 |
| FFMT3 | 4  | Female | Actor/TV   | Mary-Kate Olsen                    | Mary Kate Olsen / Ashley Olsen | 3.732 | 32 |
| FFMT3 | 5  | Female | Actor/TV   | Tyra Lynne Banks                   | Tyra Banks                     | 4.787 | 45 |
| FFMT3 | 6  | Female | Actor/TV   | Jennifer Shrader Lawrence          | Jennifer Lawrence              | 2.431 | 28 |
| FFMT3 | 7  | Female | Musician   | Jessica Ann Simpson                | Jessica Simpson                | 5.283 | 38 |
| FFMT3 | 8  | Female | Politician | Margaret Hilda Thatcher (Baroness) | Margaret Thatcher              | 6.277 | 87 |

|       |    |        |          |                                 |                      |       |    |
|-------|----|--------|----------|---------------------------------|----------------------|-------|----|
| FFMT3 | 9  | Male   | Actor/TV | James Eugene Carrey             | Jim Carrey           | 5.11  | 57 |
| FFMT3 | 10 | Female | Musician | Selena Marie Gomez              | Selena Gomez         | 4.909 | 26 |
| FFMT3 | 11 | Male   | Actor/TV | Thomas Cruise Mapother IV       | Tom Cruise           | 5.632 | 56 |
| FFMT3 | 12 | Female | Actor/TV | Susan Abigail Sarandon          | Susan Sarandon       | 4.698 | 72 |
| FFMT3 | 13 | Male   | Actor/TV | John Christopher Depp II        | Johny Depp           | 5.665 | 55 |
| FFMT3 | 14 | Female | Actor/TV | Scarlett Ingrid Johansson       | Scarlet Johansson    | 5.075 | 34 |
| FFMT3 | 15 | Female | Actor/TV | Julia Fiona Roberts             | Julia Roberts        | 4.947 | 51 |
| FFMT3 | 16 | Male   | Musician | Fred Astaire                    | Fred Astaire         | 4.927 | 88 |
| FFMT3 | 17 | Female | Musician | Madonna Louise Ciccone          | Madonna              | 6.643 | 60 |
| FFMT3 | 18 | Female | Actor/TV | Nicole Mary Kidman, AC          | Nicole Kidman        | 5.347 | 51 |
| FFMT3 | 19 | Male   | Sports   | David Robert Joseph Beckham     | David Beckham        | 5.857 | 43 |
| FFMT3 | 20 | Female | Actor/TV | Uma Karuna Thurman              | Uma Thurman          | 4.557 | 48 |
| FFMT3 | 21 | Female | Actor/TV | Demi Gene (Guynes) Kutcher      | Demi Moore           | 4.664 | 56 |
| FFMT3 | 22 | Male   | Actor/TV | Joseph Leonard Gordon-Levitt    | Joseph Gordon-Levitt | 4.045 | 38 |
| FFMT3 | 23 | Male   | Actor/TV | Thomas Jeffrey Hanks            | Tom Hanks            | 5.574 | 62 |
| FFMT3 | 24 | Male   | Musician | Kanye Omari West                | Kanye West           | 5.841 | 41 |
| FFMT3 | 25 | Male   | Actor/TV | Robert Douglas Thomas Pattinson | Robert Pattison      | 4.202 | 32 |
| FFMT3 | 26 | Female | Musician | Miley Ray Cyrus                 | Miley Ray Cyrus      | 5.529 | 26 |

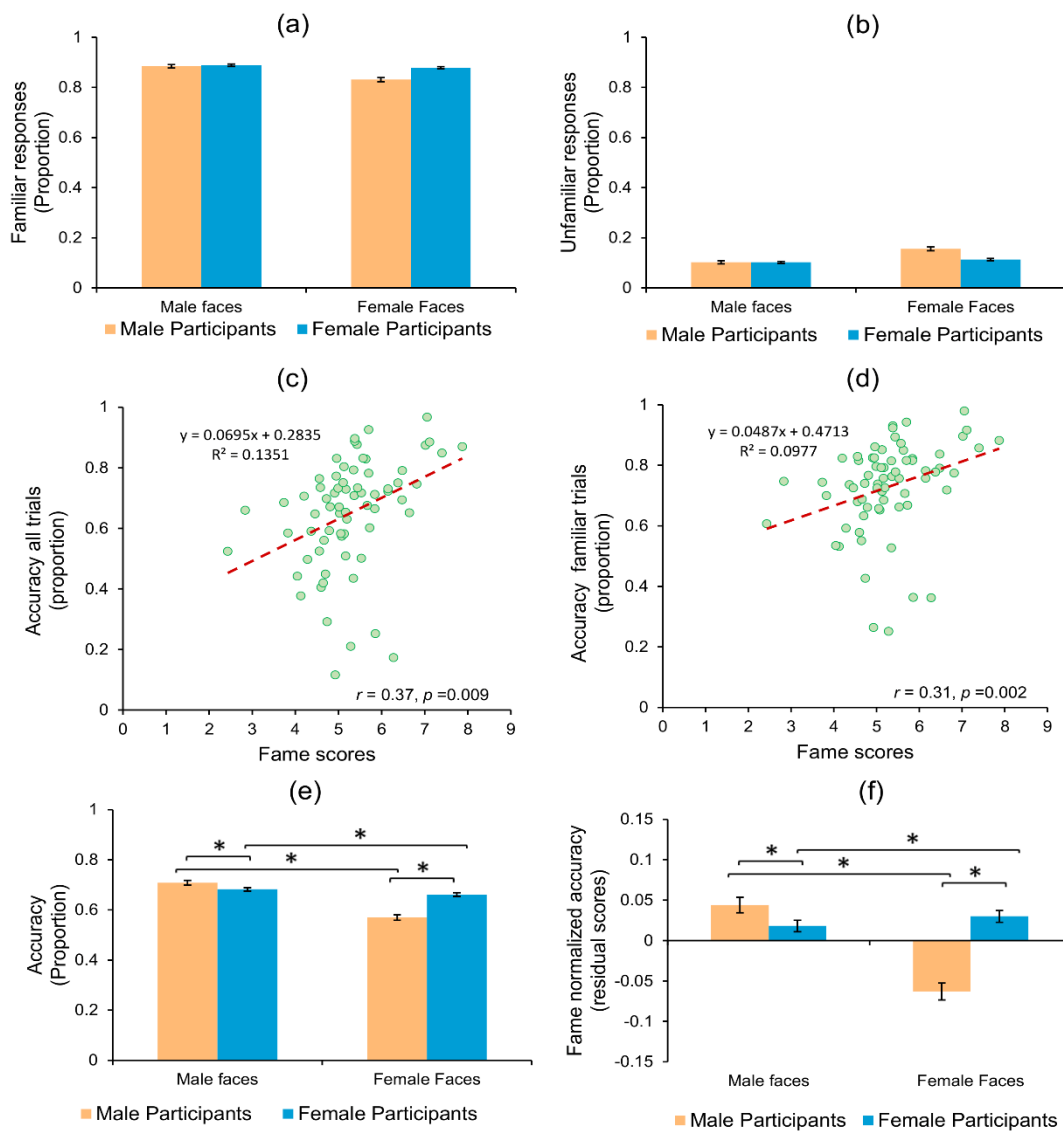

Figure S1. USA Dataset. Bar plots for a) Total proportion of familiar trials that were selected for main analysis (ref. Fig 2). b) Proportion of unfamiliar trials excluded from main analysis for each group of participant and face gender. Scatterplots show the linear fit trend line, correlation coefficient and equation used to calculate fame scores for c) all the trials and just for the (d) familiar trials. In the main analysis the equation from (d) panel was used to calculate the residual scores for USA sample data and fame normalize the accuracy values. Bar plots (e) and (f) show the data when all the trials (familiar and unfamiliar) were used to conduct the gender analysis, as like the main figures.

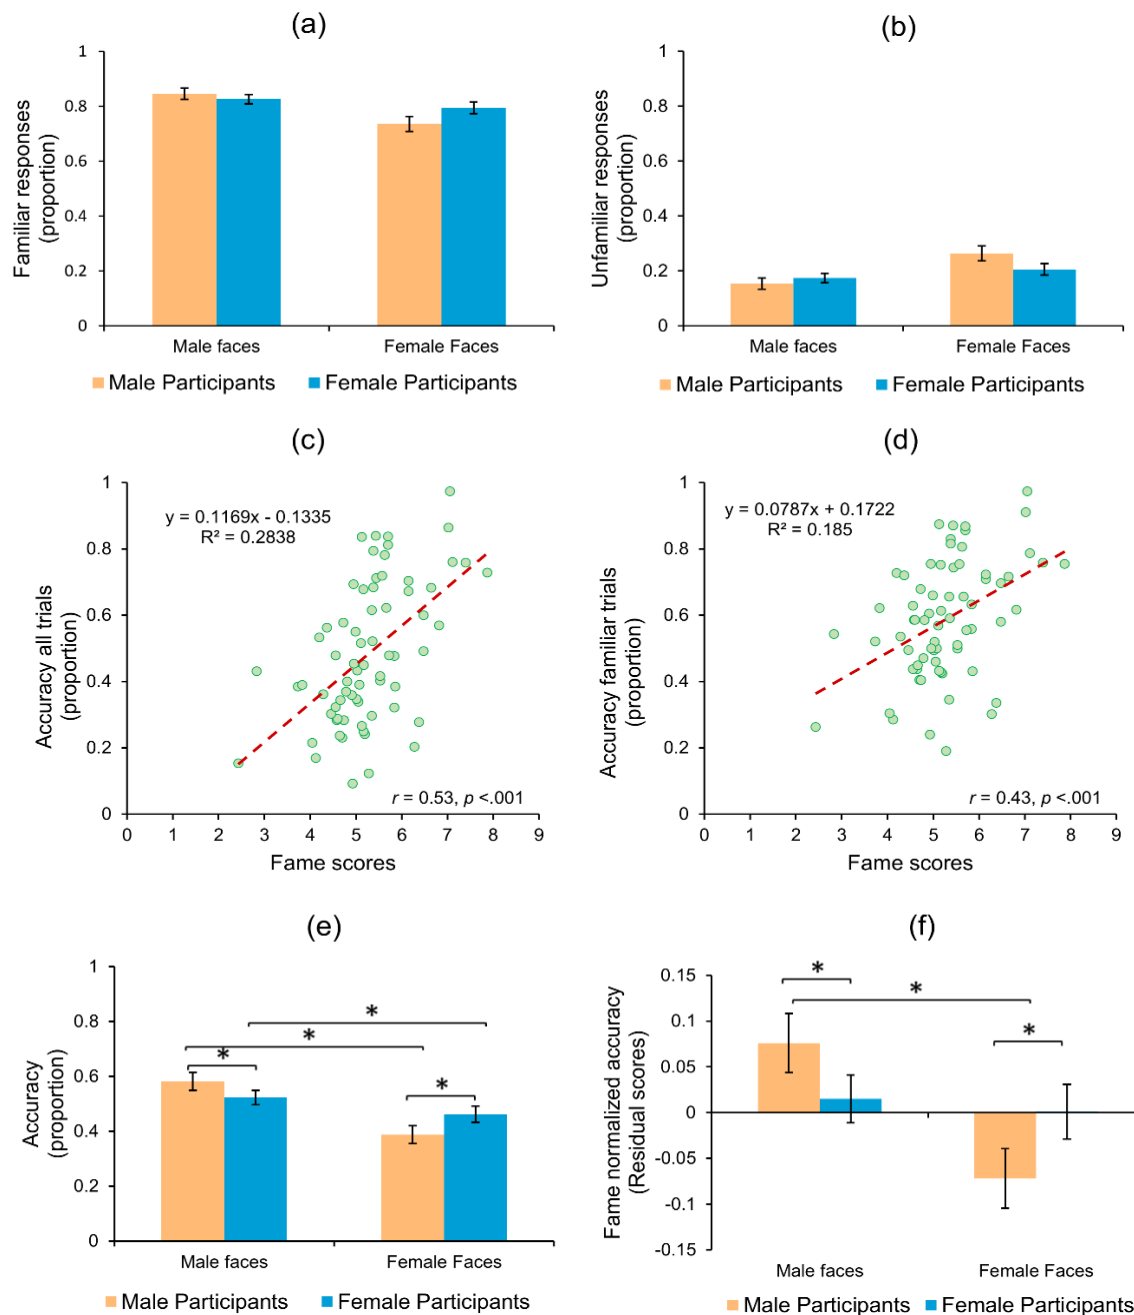

Figure S2. High Gender Equal countries dataset. Bar plots for a) Total proportion of familiar trials that were selected for main analysis (ref. Fig 3). b) Proportion of unfamiliar trials excluded from main analysis for each group of participant and face gender. Scatterplots show the linear fit trend line, correlation coefficient and equation used to calculate fame scores for c) all the trials and just for the (d) familiar trials. Bar plots (e) and (f) show the data when all the trials (familiar and unfamiliar) were used to conduct the gender analysis, as like the main figures.

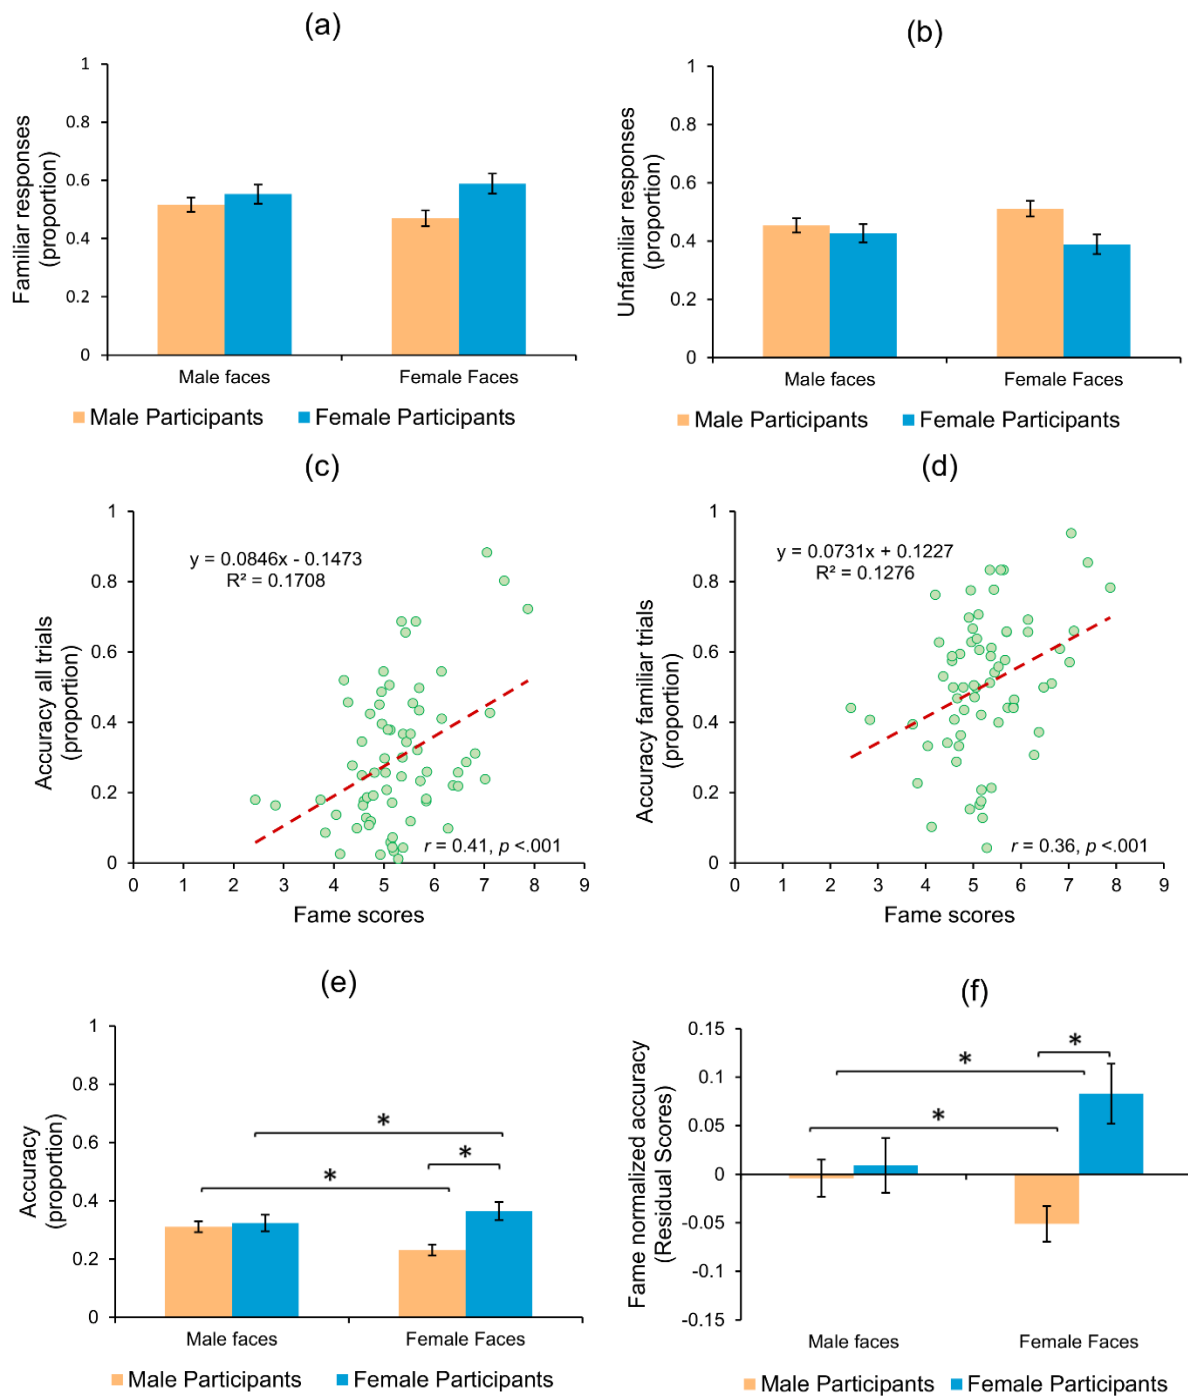

Figure S3. Low Gender Equal countries dataset. Bar plots for a) Total proportion of familiar trials that were selected for main analysis (ref. Fig 4). b) Proportion of unfamiliar trials excluded from main analysis for each group of participant and face gender. Scatterplots for c) all the trials and just for the (d) familiar trials. Bar plots (e) and (f) show the data when all the trials (familiar and unfamiliar) were used to conduct the gender analysis, as like the main figures.



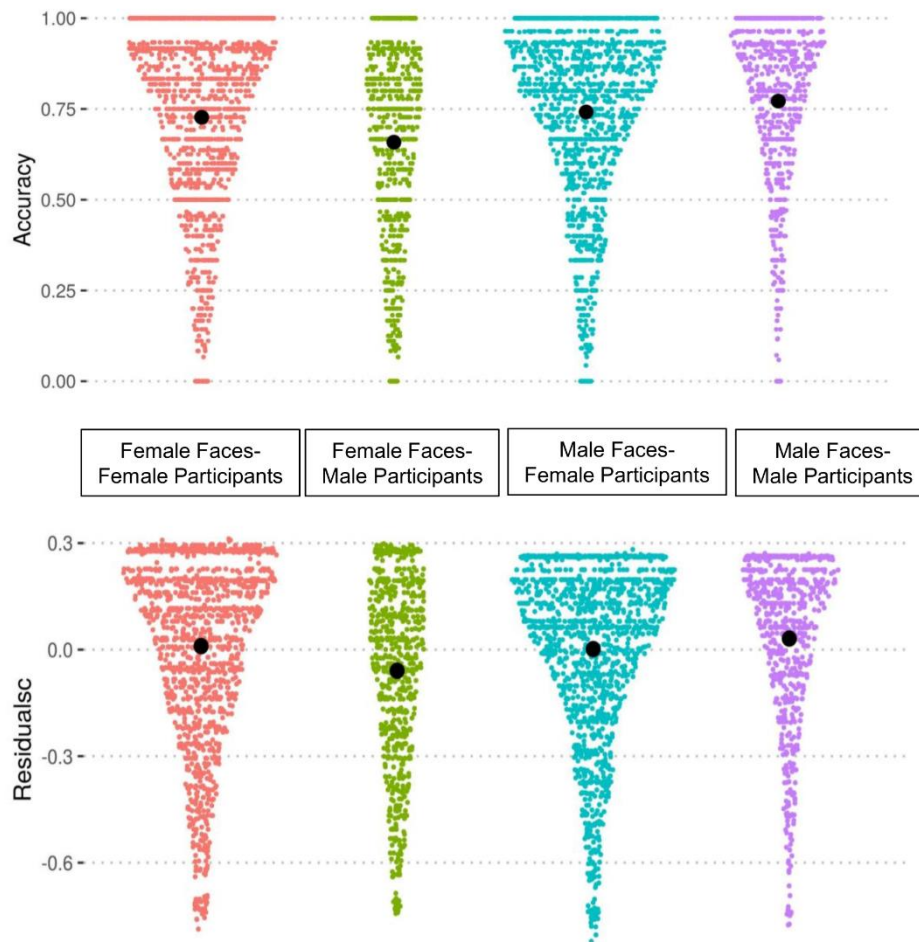

Figure S4. USA data distribution using sinaplots. Each dot represents individual participant raw accuracy (top row) and residual scores (bottom row) for familiar trials, for given gender of the faces. The length of the plot represents the score values while the width represents the number of participants with corresponding scores ( $N > 2000$ ). The black dot represents the mean of the distribution. These data were used for main statistical analysis. As can be seen, female participants responses were more widespread and distributed in comparison to males.

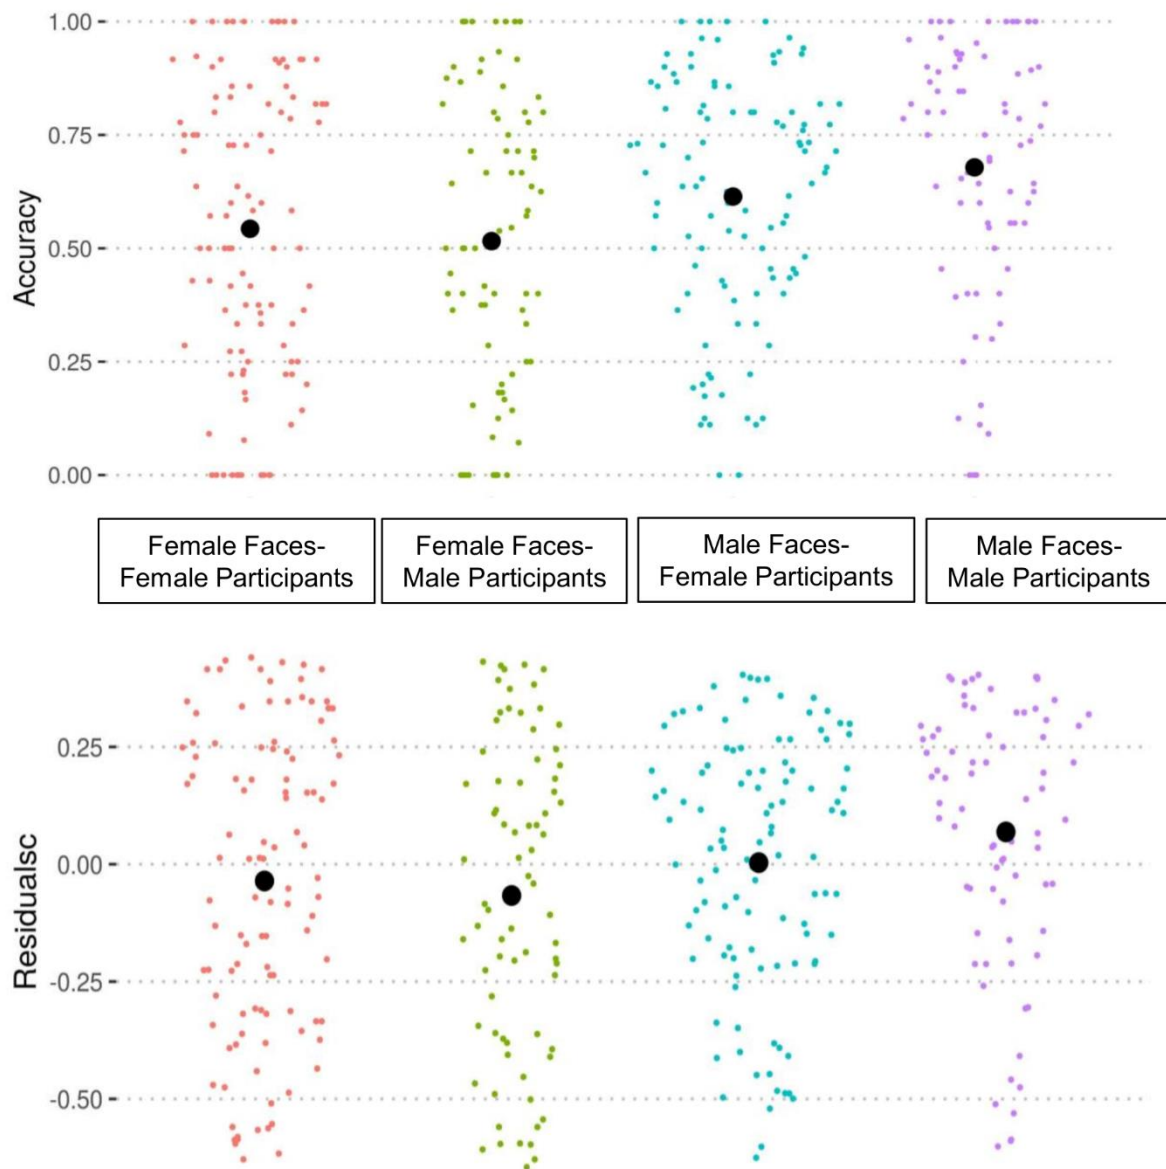

Figure S5. High Gender equal countries data distribution. Each dot represents individual participant raw accuracy (top row) and residual scores (bottom row) for familiar trials, for given gender of the faces. The length of the plot represents the score values while the width represents the number of participants with corresponding scores ( $N > 200$ ). The black dot represents the mean of the distribution. These data were used for main statistical analysis.

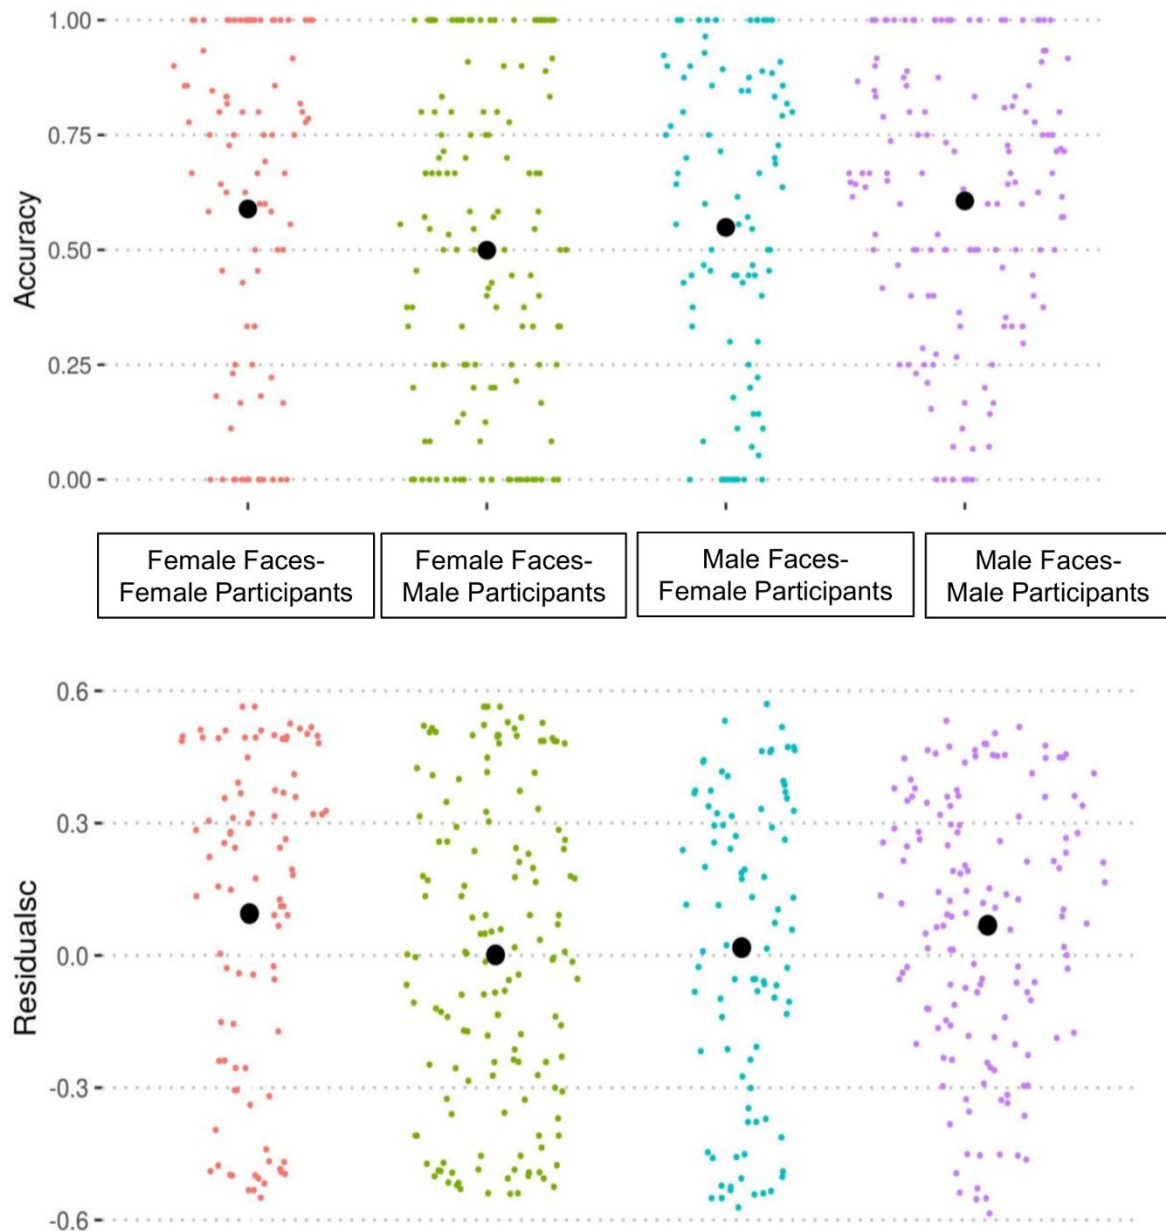

Figure S6. Low gender equal countries data distribution. Each dot represents individual participant raw accuracy (top row) and residual scores (bottom row) for familiar trials, for given gender of the faces. The length of the plot represents the score values while the width represents the number of participants with corresponding scores ( $N > 200$ ). The black dot represents the mean of the distribution. These data were used for main statistical analysis.

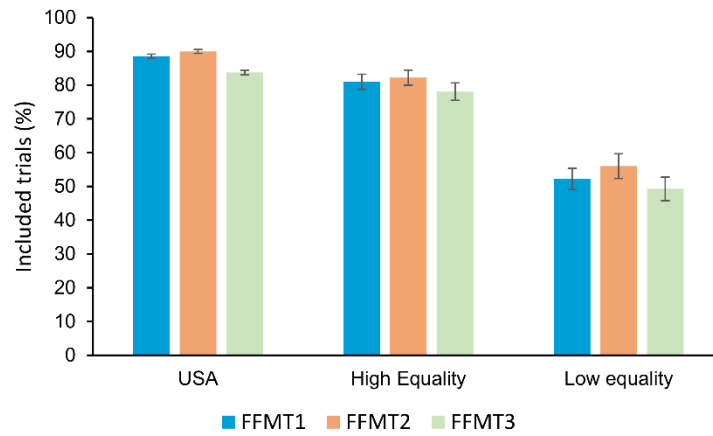

Figure S7. Trials included in each test. The figure shows the percentage of trials (familiar face trials) that were included in this study across the three different tests and country groups.

Error bars represent standard error of mean.
